# Supplementary material
Source: PubMed Central journal article supplement (PMC4108475)

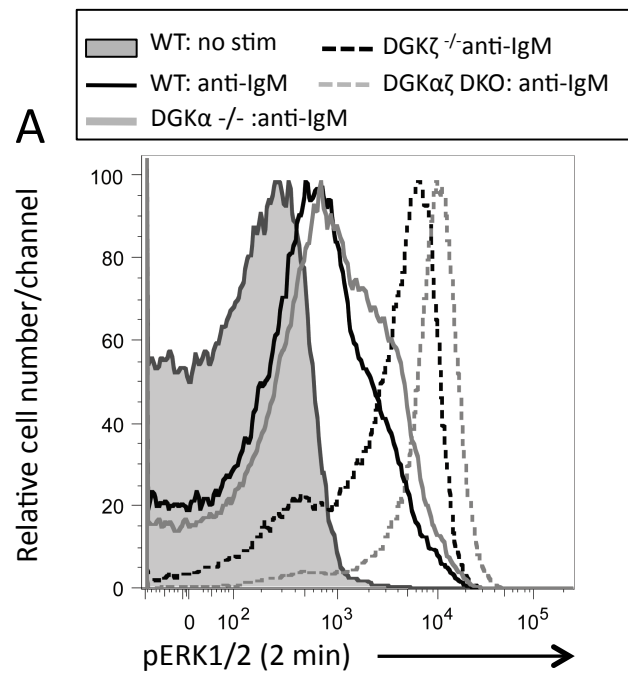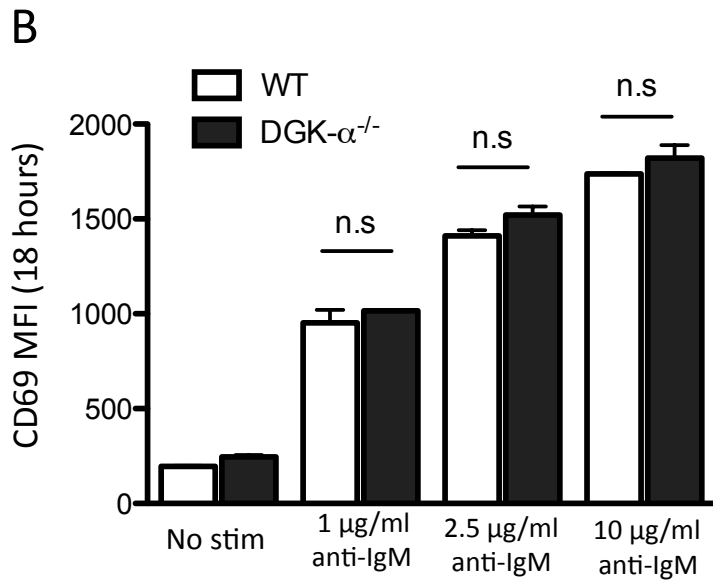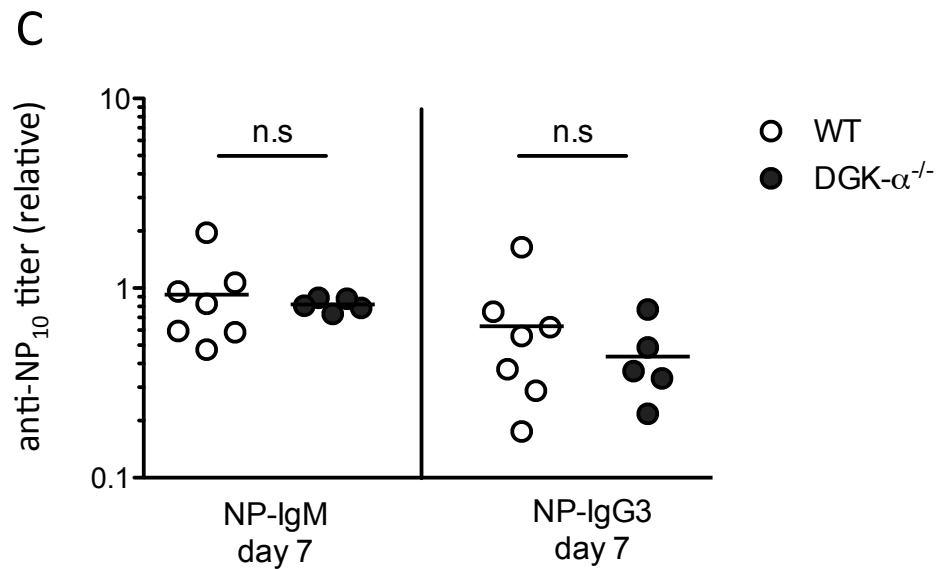

Supplement: NIHMS599246-supplement-Supplementary_Fig__1.pdf [file NIHMS599246-supplement-Supplementary_Fig__1.pdf]

A

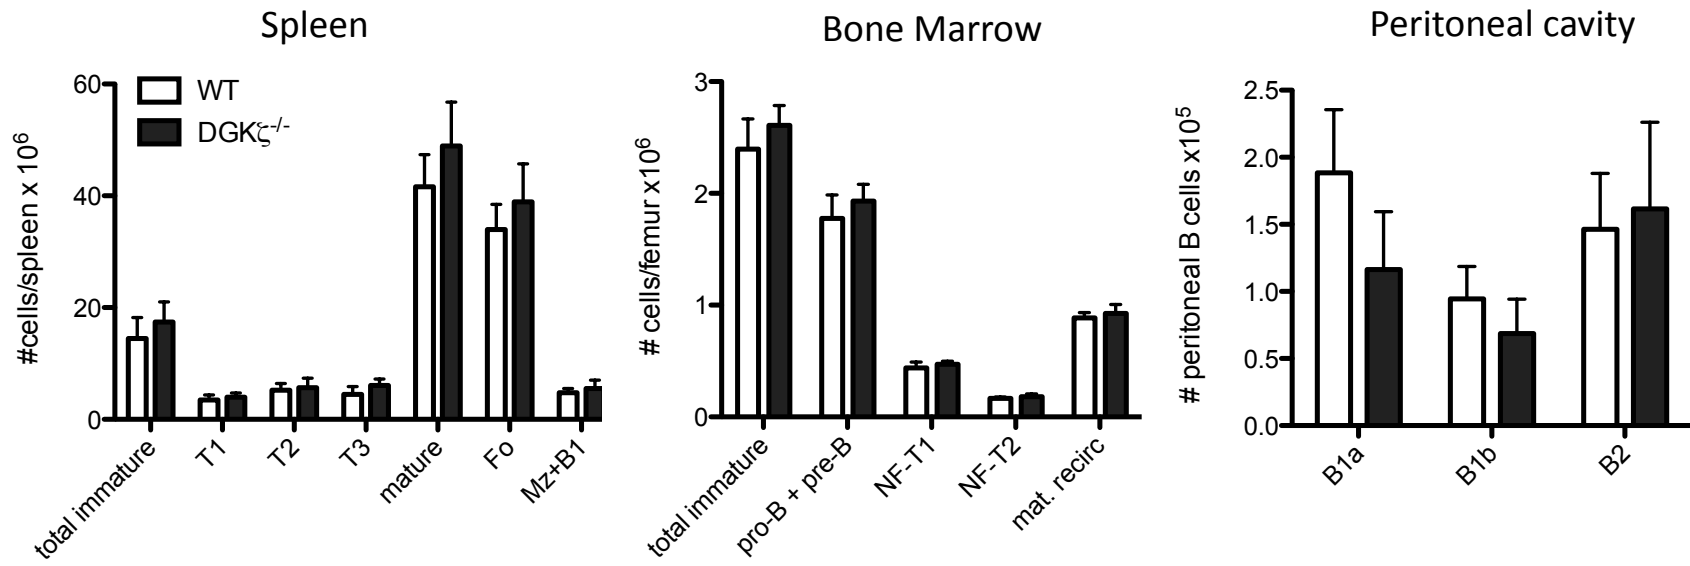

B

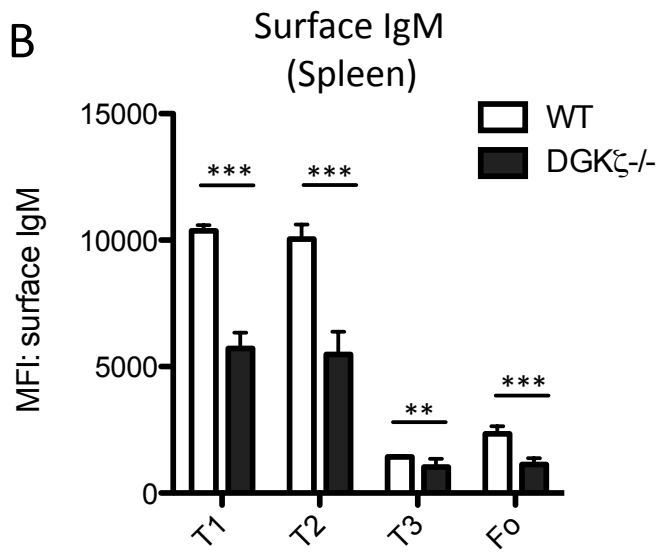

Supplement: NIHMS599246-supplement-Supplementary_Fig__3.pdf [file NIHMS599246-supplement-Supplementary_Fig__3.pdf]

**A**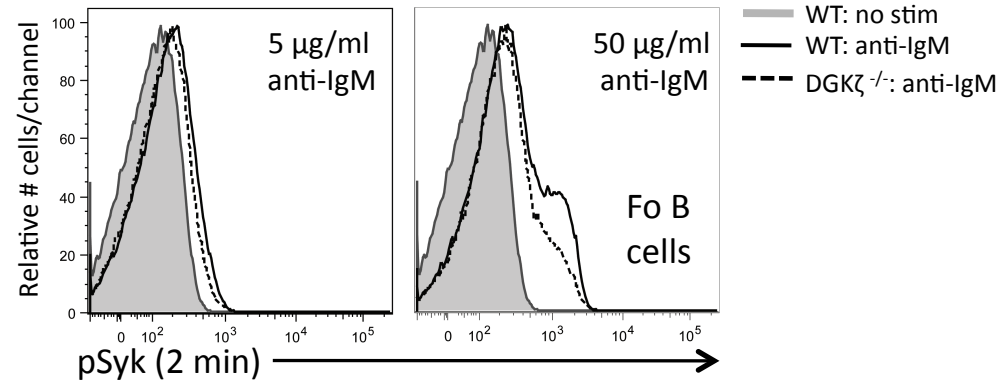**B**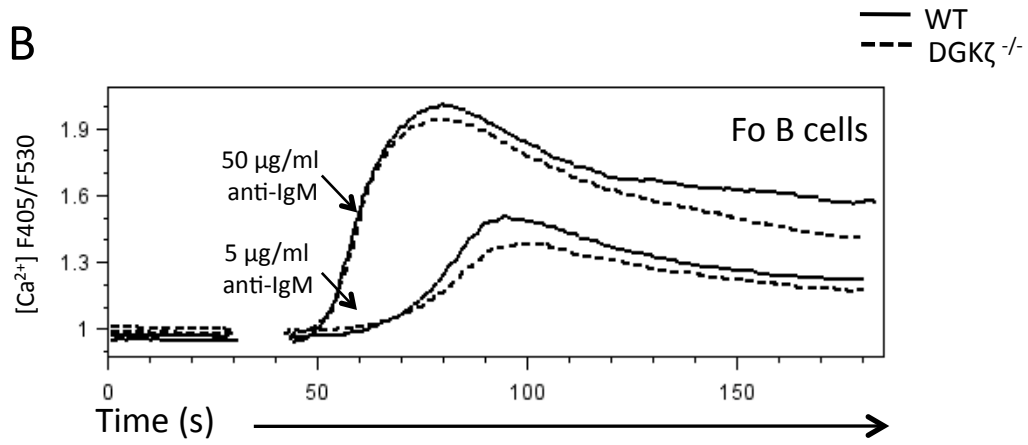

Supplement: NIHMS599246-supplement-Supplementary_Fig__4.pdf [file NIHMS599246-supplement-Supplementary_Fig__4.pdf]

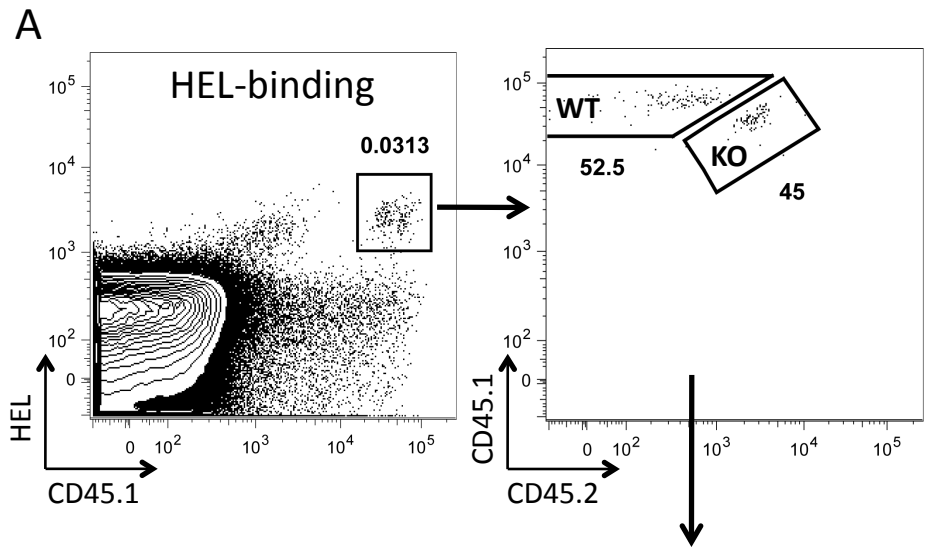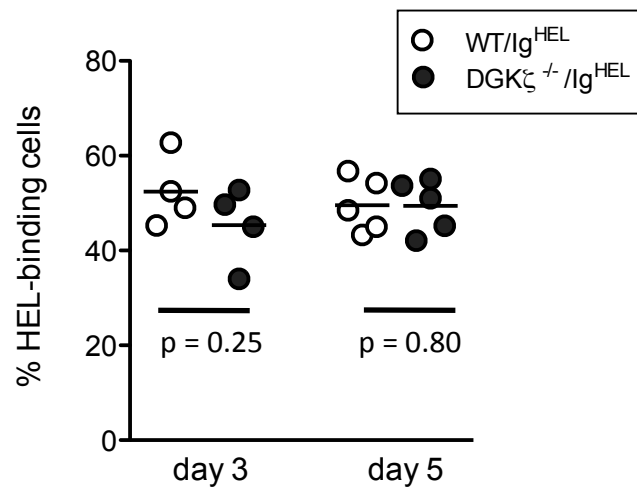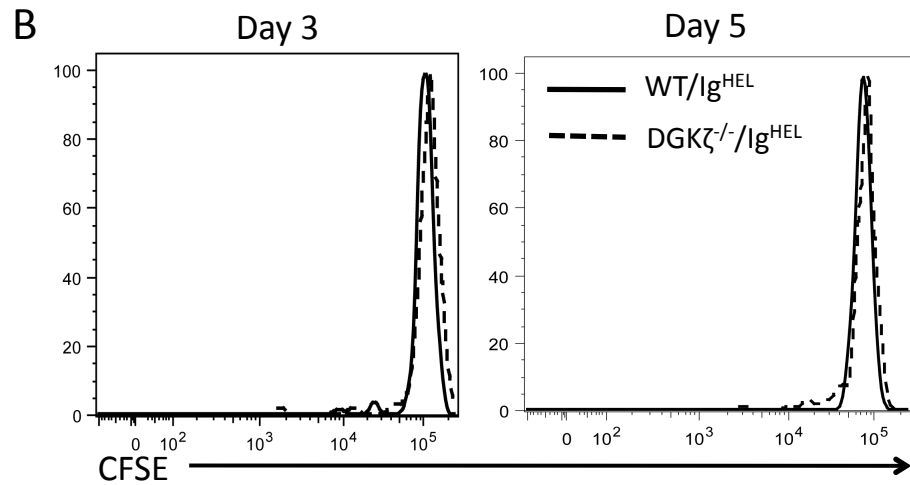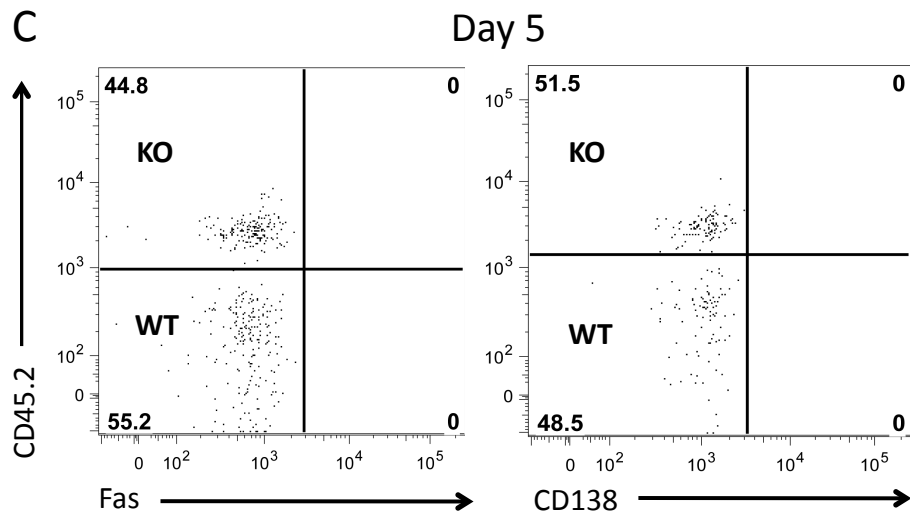

Supplement: NIHMS599246-supplement-Supplementary_Fig__5.pdf [file NIHMS599246-supplement-Supplementary_Fig__5.pdf]

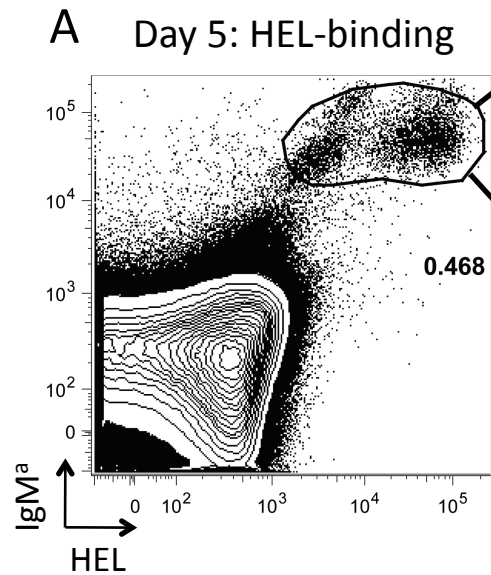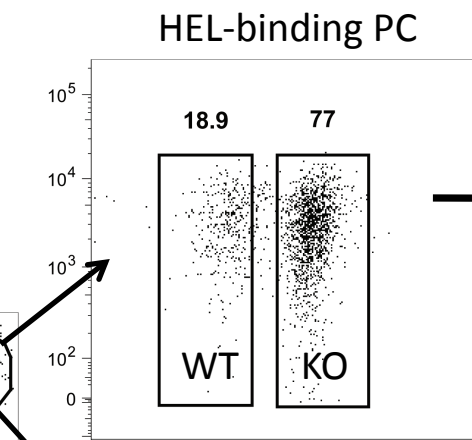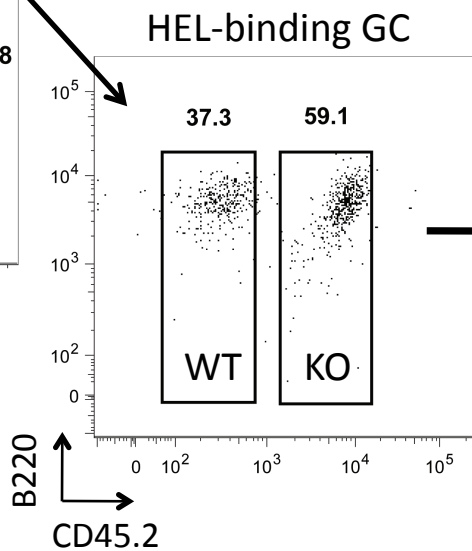

**B**

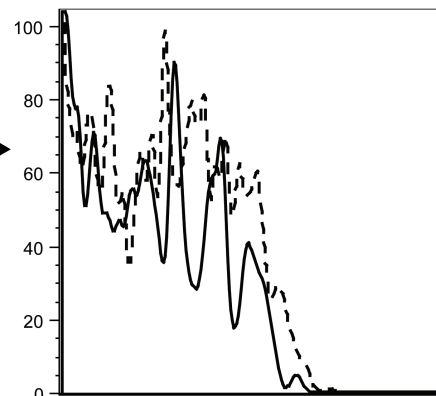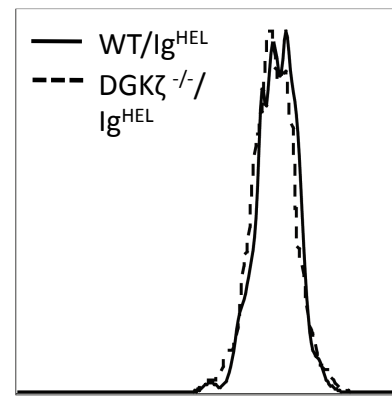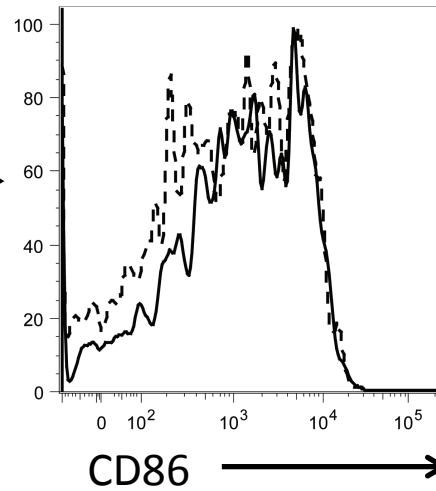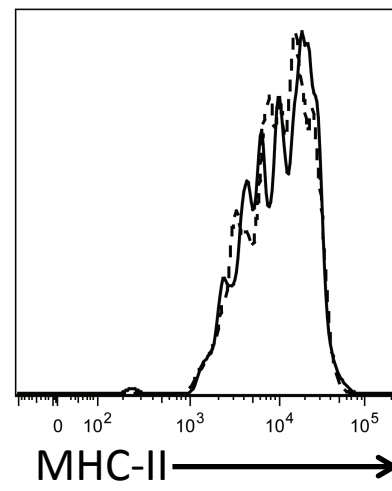

Supplement: NIHMS599246-supplement-Supplementary_Fig__6.pdf [file NIHMS599246-supplement-Supplementary_Fig__6.pdf]
